# Supplementary material
Source: MDPI journal article supplement (https://www.mdpi.com/2673-9992/14/1/100)
Supplement: s1 [file s1]

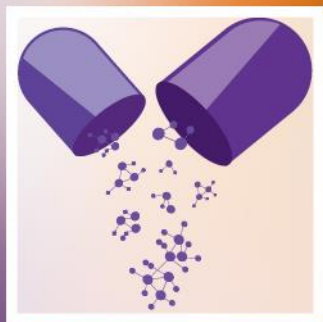

# The 8th International Electronic Conference on Medicinal Chemistry (ECMC 2022)

01–30 NOVEMBER 2022 | ONLINE

## Methoxyphenylimidazolines as potential activators of p53

Chaired by **DR. ALFREDO BERZAL-HERRANZ**;  
Co-Chaired by **PROF. DR. MARIA EMÍLIA SOUSA**

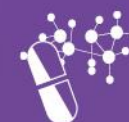

*pharmaceuticals*

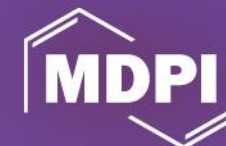

**Daniil Bazanov<sup>1\*</sup>, Nikolay Pervushin<sup>2</sup>, Natalia Lozinskaya<sup>1</sup>, Gelina Kopeina<sup>2</sup>**

<sup>1</sup> Department of Chemistry, M. V. Lomonosov Moscow State University

<sup>2</sup> Department of Medicine, M. V. Lomonosov Moscow State University

\* Corresponding author: [daniil\\_bazanov@mail.ru](mailto:daniil_bazanov@mail.ru)

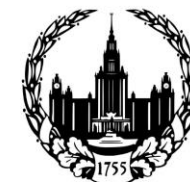

Lomonosov Moscow  
State University

# Methoxyphenylimidazolines as potential activators of p53

## Graphical Abstract

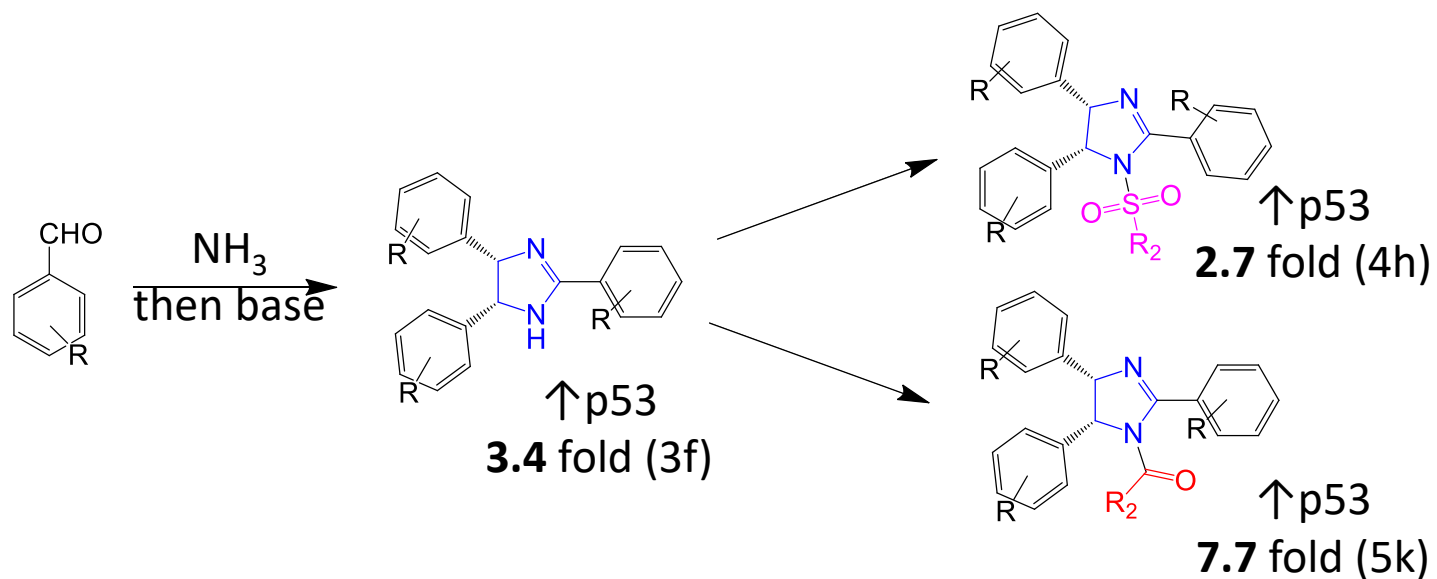

ECMC  
2022

The 8th International Electronic  
Conference on Medicinal Chemistry

01–30 NOVEMBER 2022 | ONLINE

# No2. p53/mdm2 interaction

Formation of the earth  
4.6 billion years ago

Multicellular life arises  
2.1 billion years ago

man  
0.2 million years ago

Life arises  
3.8 billion years ago

p53 - Mdm2  
Complex 1.5 billion years ago

The p53-mdm2 complex on the time scale.

Lane, D. P., & Verma, C. (2012). *Mdm2 in Evolution*. *Genes & Cancer*, 3(3-4), 320–324. doi:10.1177/1947601912458285

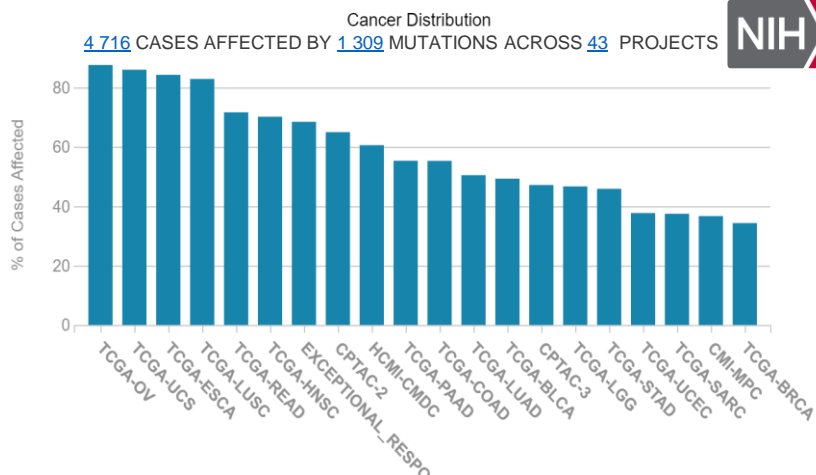

The frequency of mutations of the p53 gene in oncology (y axis), projects of the US National Cancer Institute (x axis). (<https://portal.gdc.cancer.gov/>)

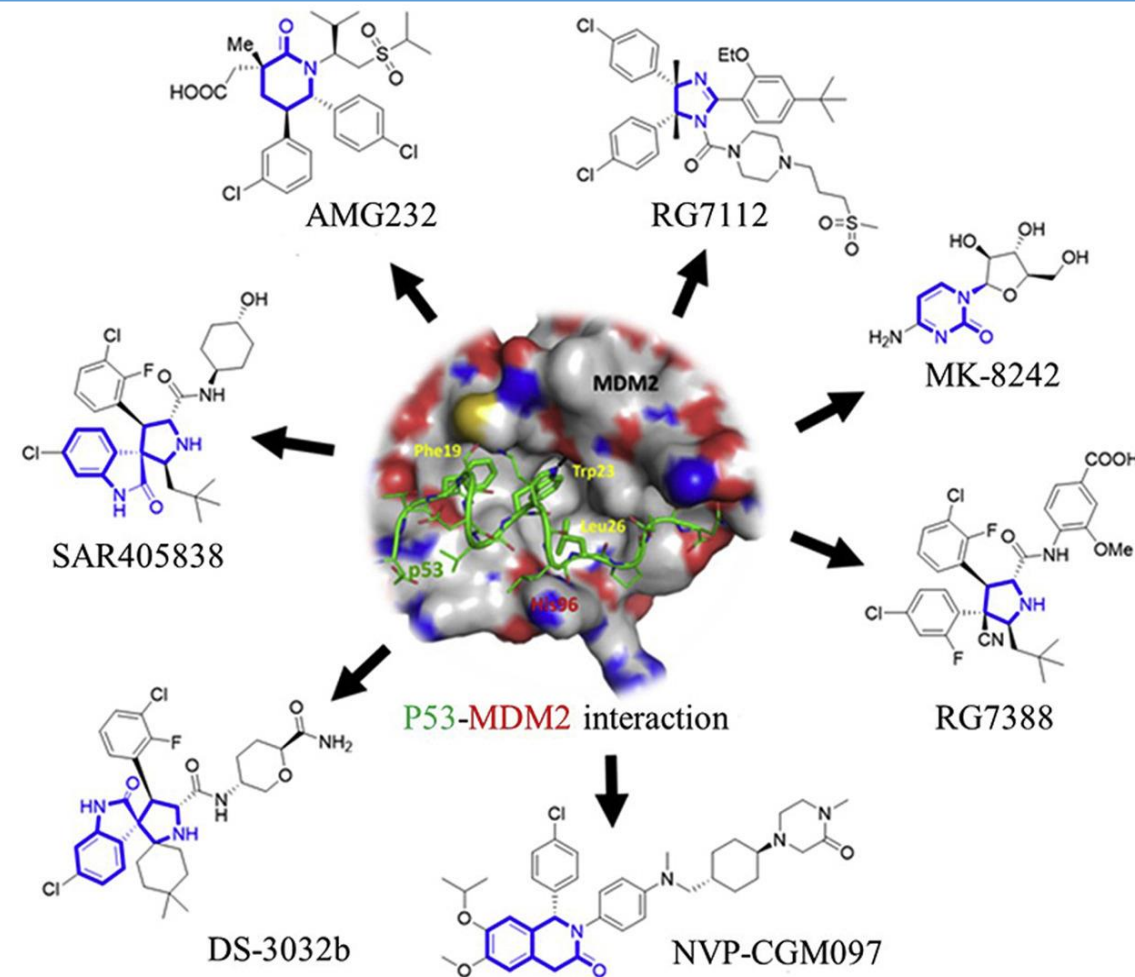

Yuan Fang, Guochao Liao, Bin Yu, *Small-molecule MDM2/X inhibitors and PROTAC degraders for cancer therapy: advances and perspectives*, *Acta Pharmaceutica Sinica B*, Volume 10, Issue 7, 2020, Pages 1253-1278, ISSN 2211-3835, <https://doi.org/10.1016/j.apsb.2020.01.003>.

# No3. p53/mdm2 inhibitors

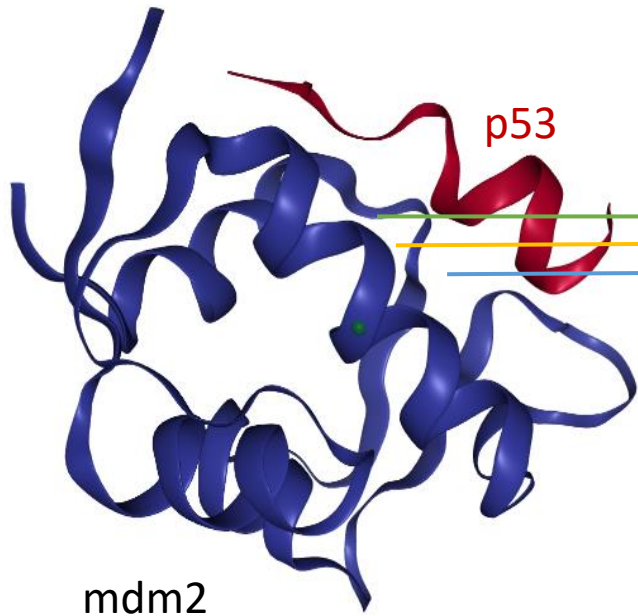

PDB:1YCR, Kussie, P. H., Gorina, S., Marechal, V., Elenbaas, B., Moreau, J., Levine, A. J., & Pavletich, N. P. (1996). *Structure of the MDM2 Oncoprotein Bound to the p53 Tumor Suppressor Transactivation Domain*. *Science*, 274(5289), 948–953. doi:10.1126/science.274.5289.948

Disadvantages of cis-imidazoline inhibitors:  
Low water solubility

## The purpose of the work:

Synthesis of new cis-imidazoline inhibitors with increased water solubility and resistance to oxidation.

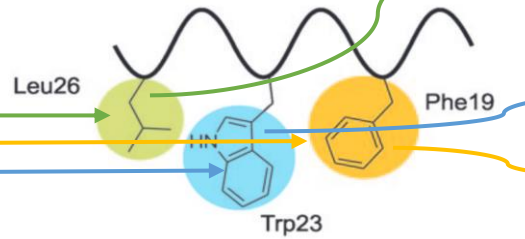

Hydrophobic amino acid residues of the p53 protein in the mdm2/x binding site.

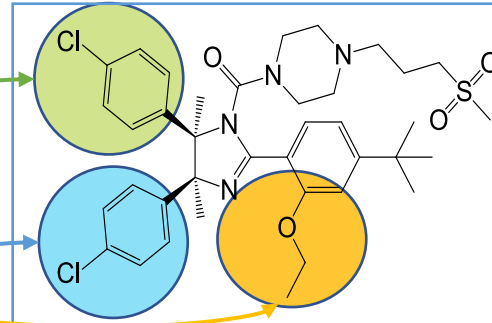

RG7112

Vu, B., Wovkulich, P., Pizzolato, G., Lovey, A., Ding, Q., Jiang, N., ... Graves, B. (2013). *Discovery of RG7112: A Small-Molecule MDM2 Inhibitor in Clinical Development*. *ACS Medicinal Chemistry Letters*, 4(5), 466–469. doi:10.1021/ml4000657

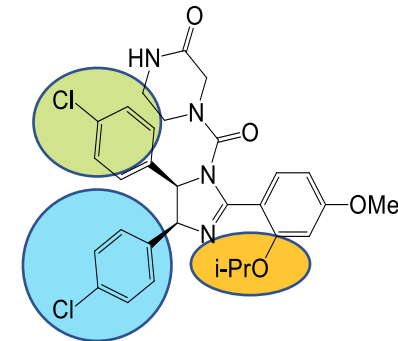

Nutlin-3a

Vassilev, L. T. (2004). *In Vivo Activation of the p53 Pathway by Small-Molecule Antagonists of MDM2*. *Science*, 303(5659), 844–848. doi:10.1126/science.1092472

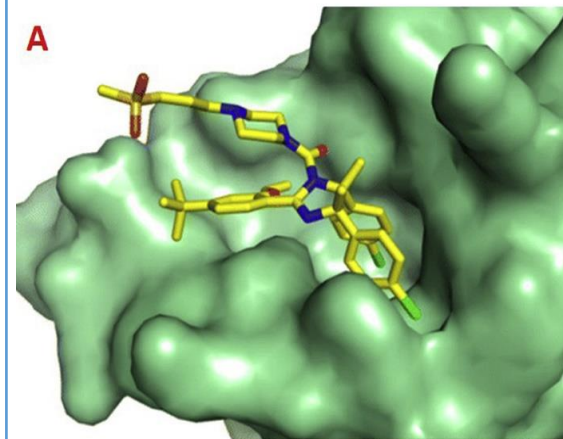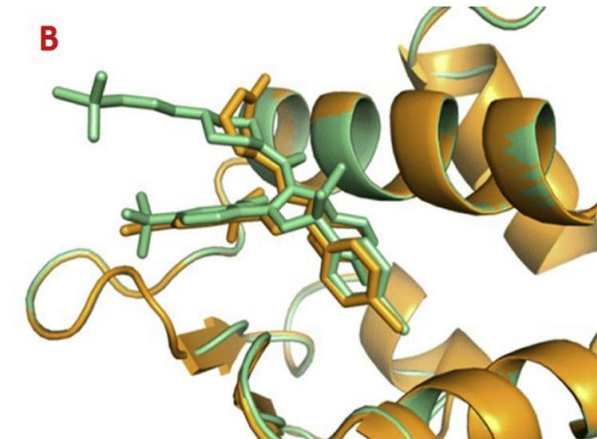

The crystal structure of MDM2 (shown by the green surface) in complex with RG7112 (yellow, PDB code: 4IPF). (B) Superposition of MDM2 crystal structures in complex with RG7112 (green) and Nutlin-3a (gold, PDB code: 4J3E).

# No4. Synthetic approach (literary)

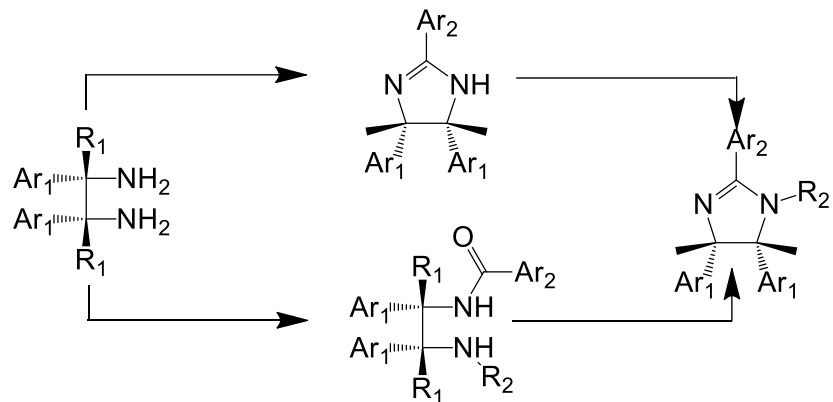

*approaches to the synthesis of p53/mdm2 imidazoline inhibitors*

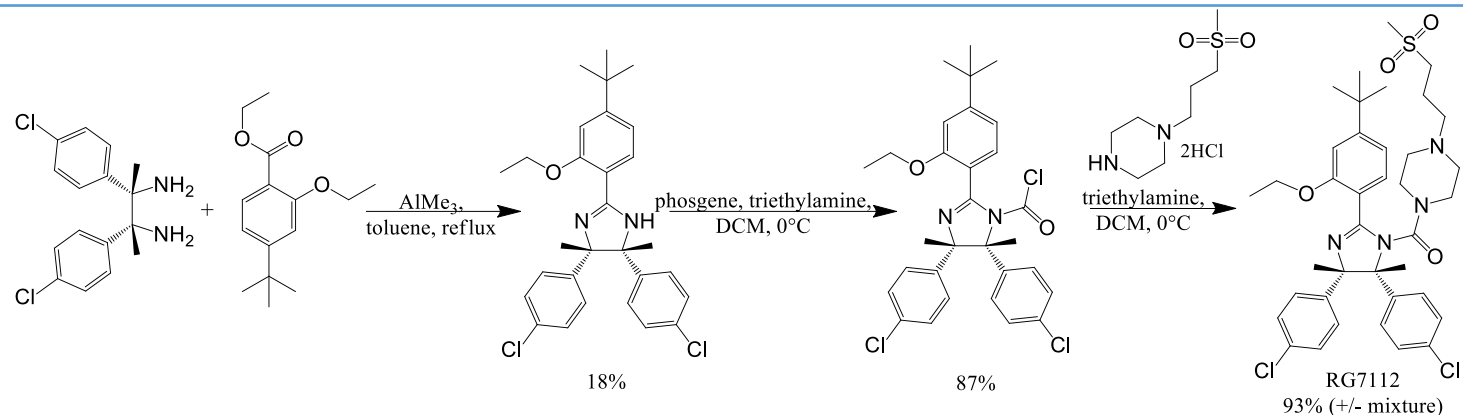

*original synthesis of RG7112 inhibitor* (Vu, B.; Wovkulich, P.; Pizzolato, G.; Lovey, A.; Ding, Q.; Jiang, N.; Liu, J.J.; Zhao, C.; Glenn, K.; Wen, Y.; et al. **Discovery of RG7112: A Small-Molecule MDM2 Inhibitor in Clinical Development.** ACS Medicinal Chemistry Letters 2013, 4, 466–469, doi:10.1021/ml4000657)

# No5. The synthetic approach of this work

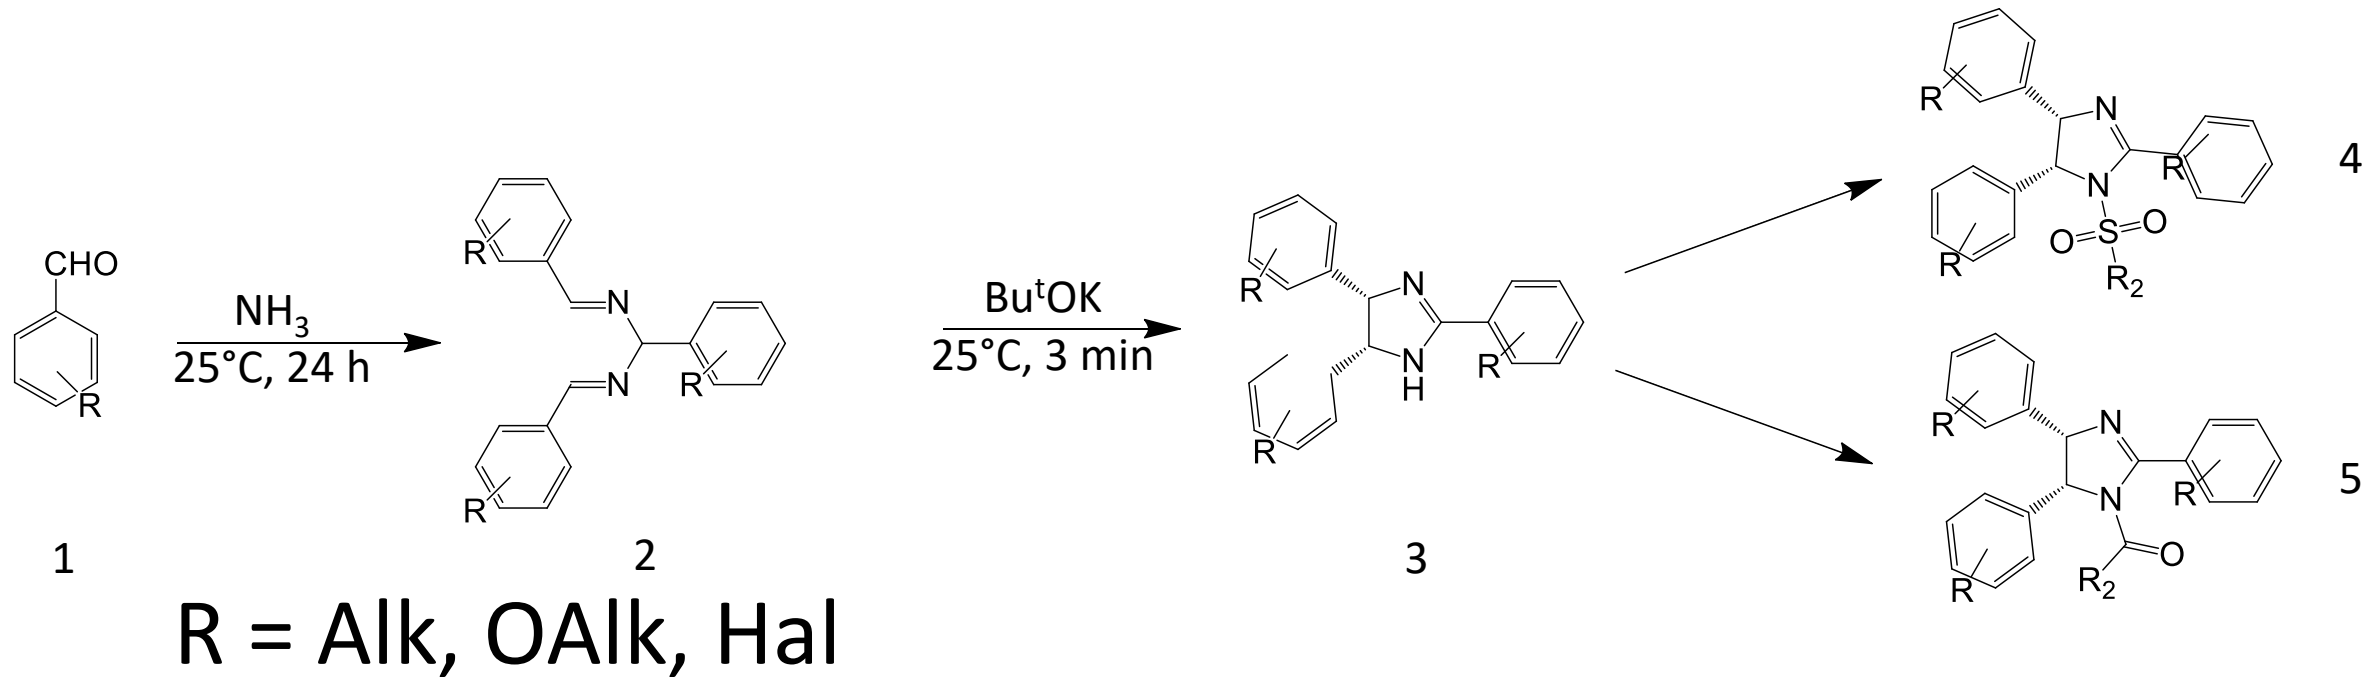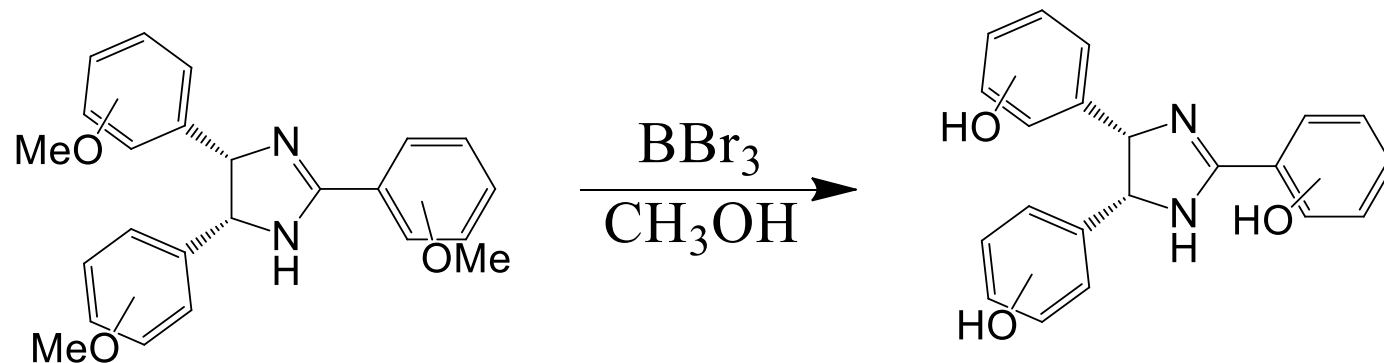

# No6. Molecular modeling

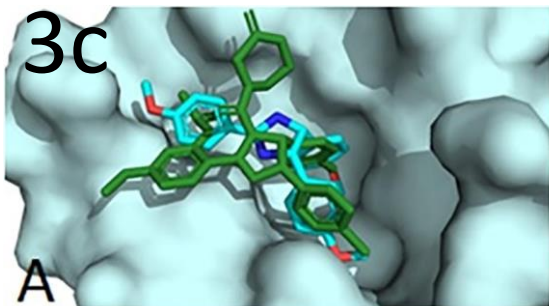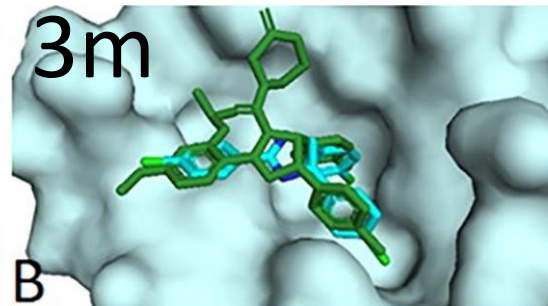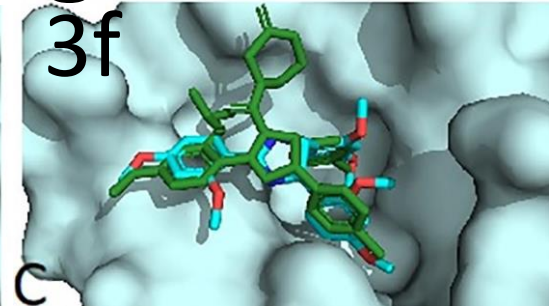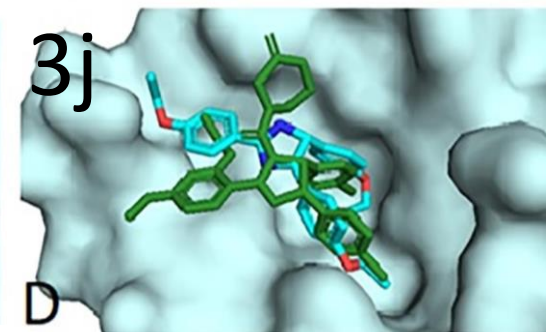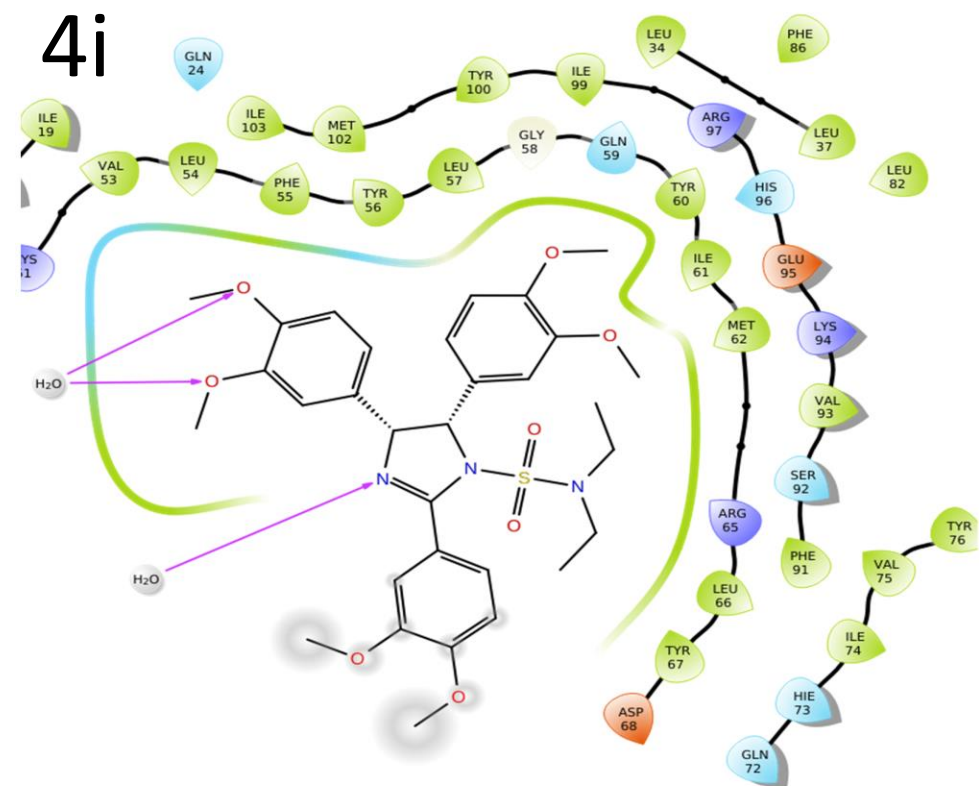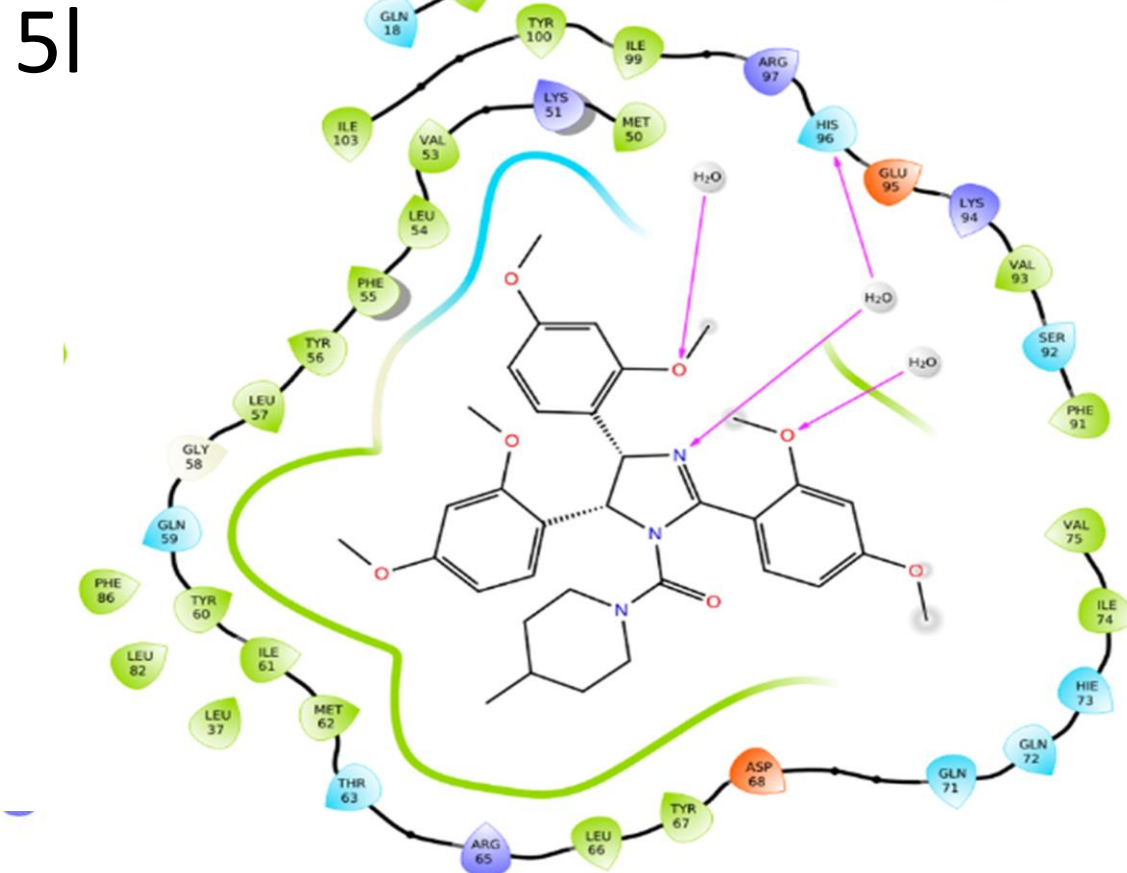

- Charged (negative)
- Charged (positive)
- Glycine
- Hydrophobic
- Polar
- Water
- H-bond
- Pi-Pi stacking
- Solvent exposure

# No7. Cytotoxicity (series No3)

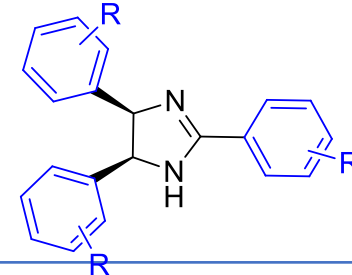

| No        | Compound | R             | A549 (IC50, μM)   | No | Compound | R                                                         | A549 (IC50, μM)     |
|-----------|----------|---------------|-------------------|----|----------|-----------------------------------------------------------|---------------------|
| 1         | 3a       | 2-MeO         | 27.36±0.79        | 16 | 3p       | 4-Br                                                      | 9.05±0.20           |
| 2         | 3b       | 3-MeO         | 64.31±1.04        | 17 | 3q       | 4-F                                                       | 107.83±4.65         |
| 3         | 3c       | 4-MeO         | 43.90±1.87        | 18 | 3r       | 3,5-diMeO                                                 | – <sup>2</sup>      |
| 4         | 3d       | 2,3-diMeO     | 16.18±0.29        | 19 | 3s       | 4-OH                                                      | n.a. <sup>1</sup>   |
| 5         | 3e       | 2-EtO,3-MeO   | 24.26±2.10        | 20 | 3t       | 4-OH(R <sup>1</sup> ),4-MeO(R <sup>2</sup> ) <sup>3</sup> | n.a. <sup>1</sup>   |
| 6         | 3f       | 2,4-diMeO     | 9.32±0.47         | 21 | 3u       | 3-OH                                                      | 310.60±16.67        |
| 7         | 3g       | 3,4-diMeO     | 84.69±0.76        | 22 | 3v       | 2,5-diOH                                                  | n.a. <sup>1</sup>   |
| 8         | 3h       | 2,5-diMeO     | 21.42±1.07        | 23 | 3w       | 3,4,5-trisHO                                              | – <sup>2</sup>      |
| 9         | 3i       | 3,4,5-trisMeO | n.a. <sup>1</sup> | 24 | 3x       | 4-Me                                                      | – <sup>2</sup>      |
| 10        | 3j       | 4-EtO         | 13.26±0.37        | 25 | 3y       | 3-Me                                                      | – <sup>2</sup>      |
| 11        | 3k       | 3-MeO,4-EtO   | 67.49±0.04        | 26 | 3z       | 2-Me                                                      | – <sup>2</sup>      |
| 12        | 3l       | 2-Cl          | 10.68±0.18        | 27 | 3aa      | 4-Et                                                      | – <sup>2</sup>      |
| 13        | 3m       | 4-Cl          | 20.25±1.88        | 28 | 3ab      | 4-iPr                                                     | – <sup>2</sup>      |
| 14        | 3n       | 2,4-diCl      | 164.41±13.74      | 29 | 3ac      | 2,4,5-trisMeO                                             | – <sup>2</sup>      |
| 15        | 3o       | 3,4-diCl      | 13.72±1.02        | 30 | 3ad      | 2,3,4-trisMeO                                             | – <sup>2</sup>      |
| Nutlin-3a |          |               |                   |    |          |                                                           | 15.12 <sup>15</sup> |

1 n.a. lack of activity of this type

2 tests were not carried out

Bazanov, D.R.; Pervushin, N. V.; Savitskaya, V.Yu.; Anikina, L. V.; Proskurnina, M. V.; Lozinskaya, N.A.; Kopeina, G.S. **2,4,5-Tris(Alkoxyaryl)Imidazoline Derivatives as Potent Scaffold for Novel P53-MDM2 Interaction Inhibitors: Design, Synthesis, and Biological Evaluation**. *Bioorganic & Medicinal Chemistry Letters* **2019**, 29, 2364–2368, doi:10.1016/j.bmcl.2019.06.007.

# No8. Biological activity (series No3)

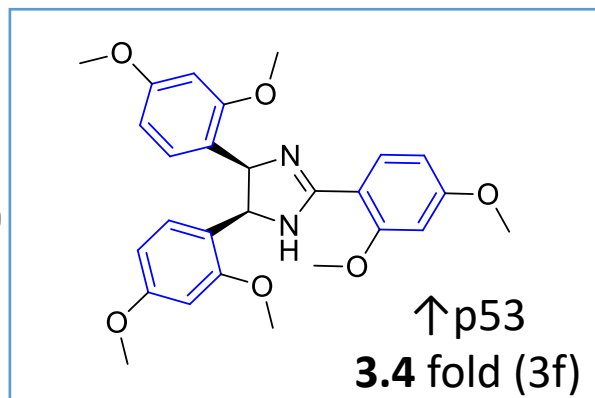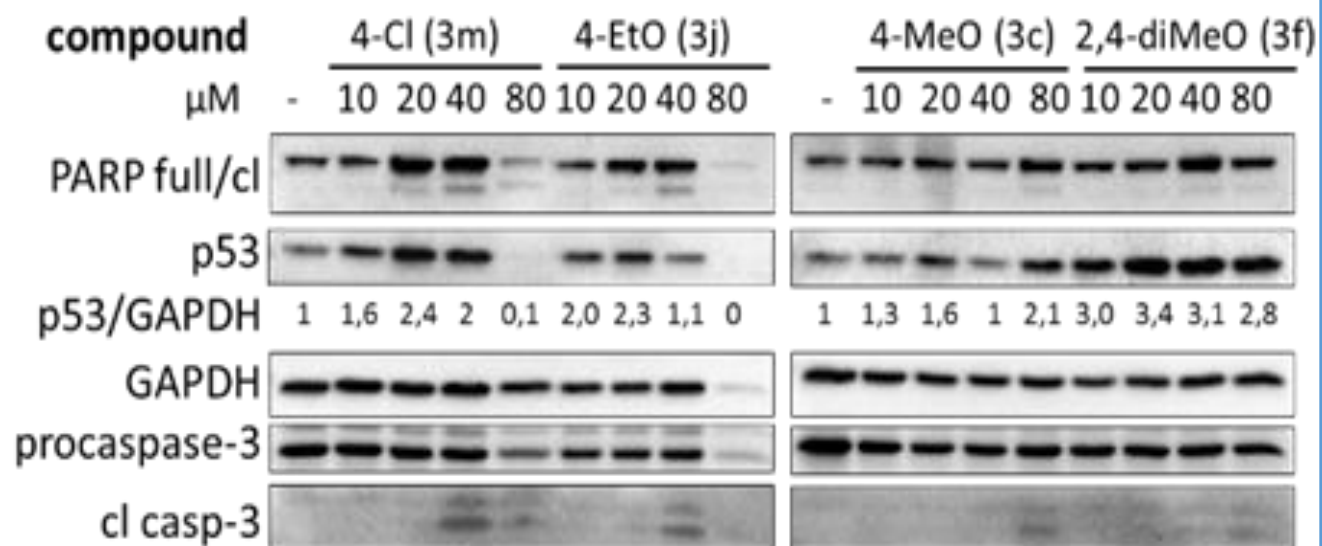

Western Blot analysis of total cellular lysates from **A549** cells upon treatment with indicated compounds.

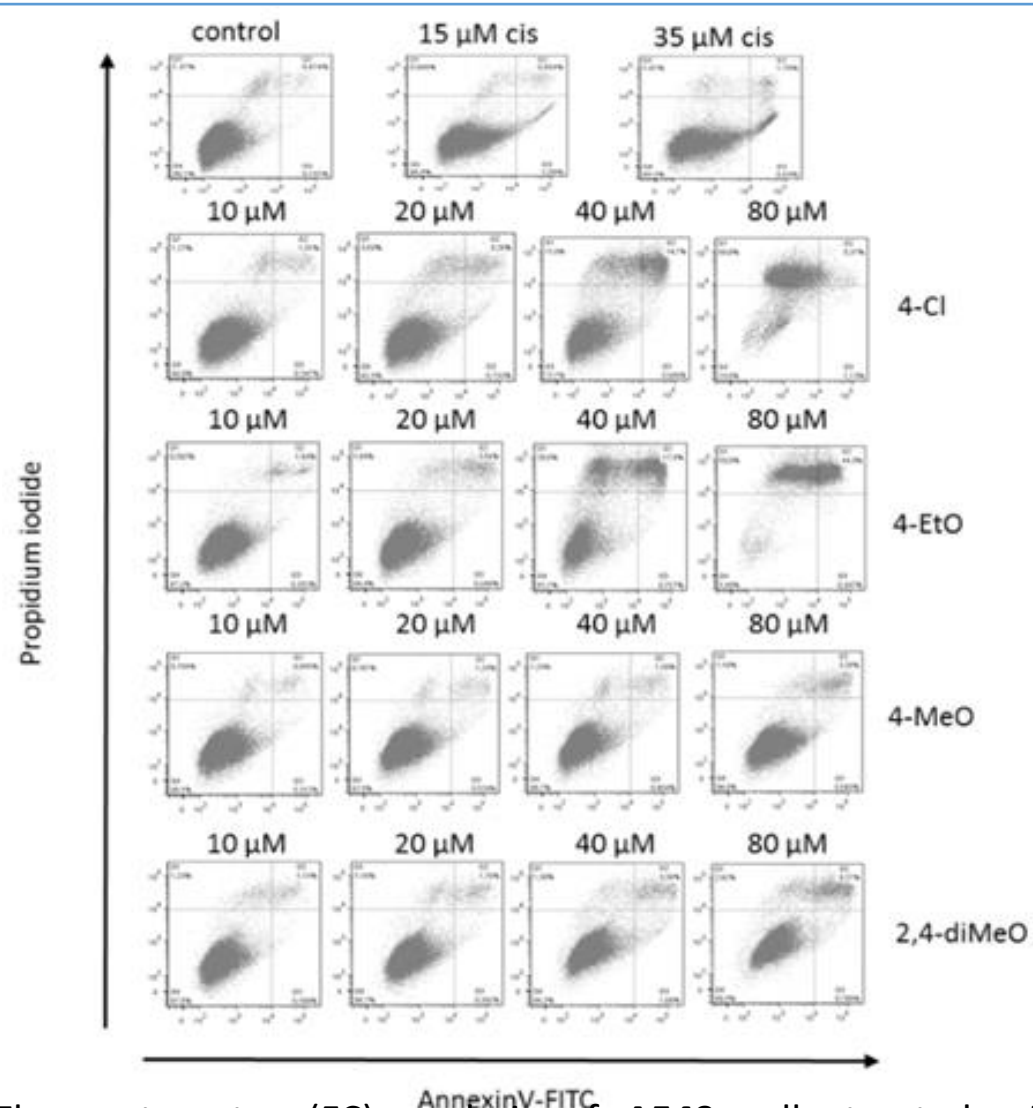

Flow cytometry (FC) analysis of **A549** cells treated with cisplatin, 3c, 3f, 3j and 3m.

# No9. Synthesis and biological activity of sulfonamide derivatives (series No4)

| No | Compound | R1        | R2                                                                                  | Yield, % | ↑ p53 |
|----|----------|-----------|-------------------------------------------------------------------------------------|----------|-------|
| 1  | 4a       | 4-MeO     | Ts                                                                                  | 85       | -     |
| 2  | 4b       | 4-MeO     | 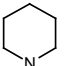   | 78       | -     |
| 3  | 4c       | 4-MeO     | 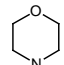   | 76       | -     |
| 4  | 4d       | 2,4-diMeO | Ts                                                                                  | 73       | -     |
| 5  | 4e       | 2,4-diMeO | 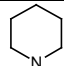   | 36       | -     |
| 6  | 4f       | 3,4-diMeO | Ts                                                                                  | 36       | 0,7   |
| 7  | 4g       | 3,4-diMe  | 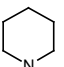   | 31       | 1,5   |
| 8  | 4h       | 3,4-diMeO | 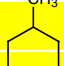   | 35       | 2,7   |
| 9  | 4i       | 3,4-diMeO | Et <sub>2</sub> N                                                                   | 37       | 2,3   |
| 10 | 4j       | 3,4-diMeO | 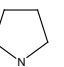 | 27       | 0,8   |
| 11 | 4k       | 2,5-diMeO | 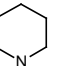 | 81       | -     |
| 12 | 4l       | 2,5-diMeO | 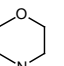 | 76       | -     |

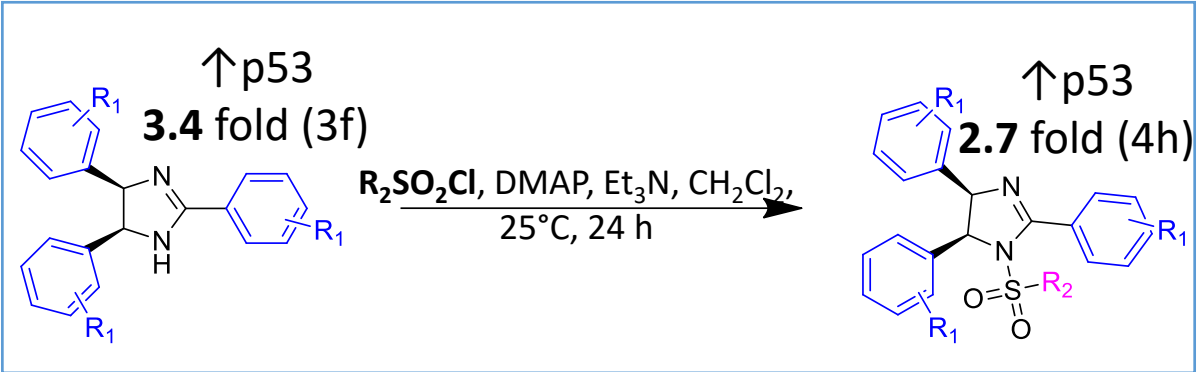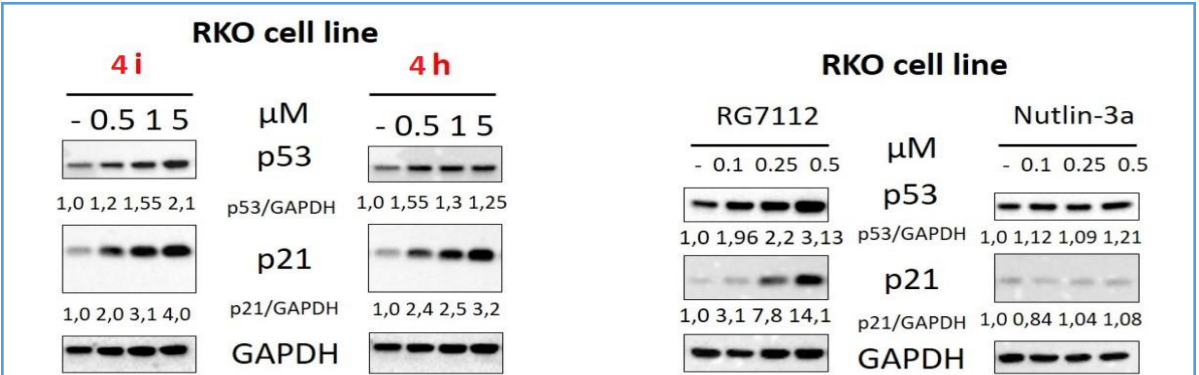

# №10. Synthesis and biological activity of carbamides (series №5)

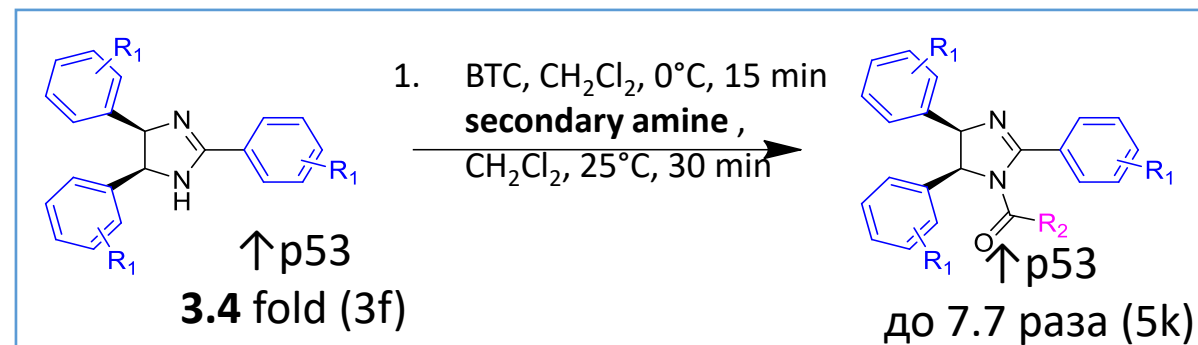

| № | Compound  | R <sub>1</sub> | R <sub>2</sub> | IC <sub>50</sub> , μM<br>A549 | №  | Compound  | R <sub>1</sub> | R <sub>2</sub> | IC <sub>50</sub> , μM<br>A549 | №  | Compound   | R <sub>1</sub> | R <sub>2</sub> | IC <sub>50</sub> , μM<br>A549 |
|---|-----------|----------------|----------------|-------------------------------|----|-----------|----------------|----------------|-------------------------------|----|------------|----------------|----------------|-------------------------------|
| 1 | <b>5a</b> | 4-MeO          |                | 58.2±9.2                      | 10 | <b>5j</b> | 2,4-diMeO      |                | 105,7±20,2                    | 19 | <b>5s</b>  | 3,4-diMeO      |                | 102.1±50                      |
| 2 | <b>5b</b> | 4-MeO          |                | 165±100                       | 11 | <b>5k</b> | 2,4-diMeO      |                | 30±2,5                        | 20 | <b>5t</b>  | 3,4-diMeO      |                | >200                          |
| 3 | <b>5c</b> | 4-MeO          |                | 53.9±7                        | 12 | <b>5l</b> | 2,4-diMeO      |                | 17,8±2,1                      | 21 | <b>5u</b>  | 3,5-diMeO      |                | 24,6±6,3                      |
| 4 | <b>5d</b> | 4-MeO          |                | 38±5                          | 13 | <b>5m</b> | 2,4-diMeO      |                | 21±3                          | 22 | <b>5v</b>  | 3,5-diMeO      |                | 93.6±20                       |
| 5 | <b>5e</b> | 4-MeO          |                | 124±60                        | 14 | <b>5n</b> | 3,4-diMeO      |                | 105.2±25                      | 23 | <b>5w</b>  | 3,5-diMeO      |                | 104,3±36                      |
| 6 | <b>5f</b> | 4-MeO          |                | 38,8±4,5                      | 15 | <b>5o</b> | 3,4-diMeO      |                | 123.4±41.5                    | 24 | <b>5x</b>  | 4-Cl           |                | 16,2±3,1                      |
| 7 | <b>5g</b> | 4-MeO          |                | 89,8±7,5                      | 16 | <b>5p</b> | 3,4-diMeO      |                | 104.4±50.5                    | 25 | <b>5y</b>  | 2,4-diCl       |                | 25,2±8,2                      |
| 8 | <b>5h</b> | 2-MeO          |                | 60,4±26,3                     | 17 | <b>5q</b> | 3,4-diMeO      |                | 123.1±50                      | 26 | <b>5z</b>  | 2,4-diCl       |                | 18,7±2,5                      |
| 9 | <b>5i</b> | 2,4-diMeO      |                | 35,2±6,4                      | 18 | <b>5r</b> | 3,4-diMeO      |                | -                             | 27 | <b>5aa</b> | 2,4-diCl       |                | 86,6±45,4                     |

# No11. Synthesis and biological activity of carbamides (series No5)

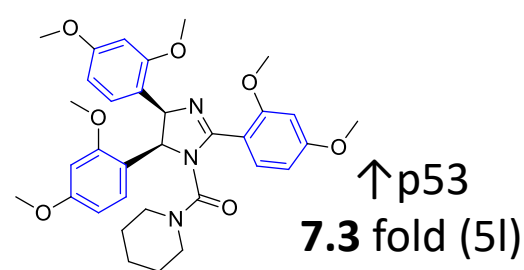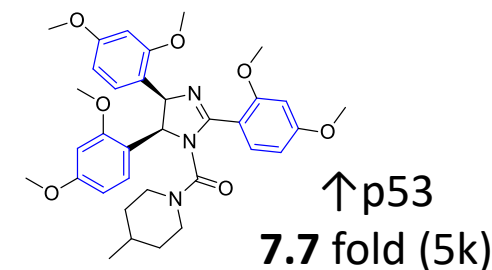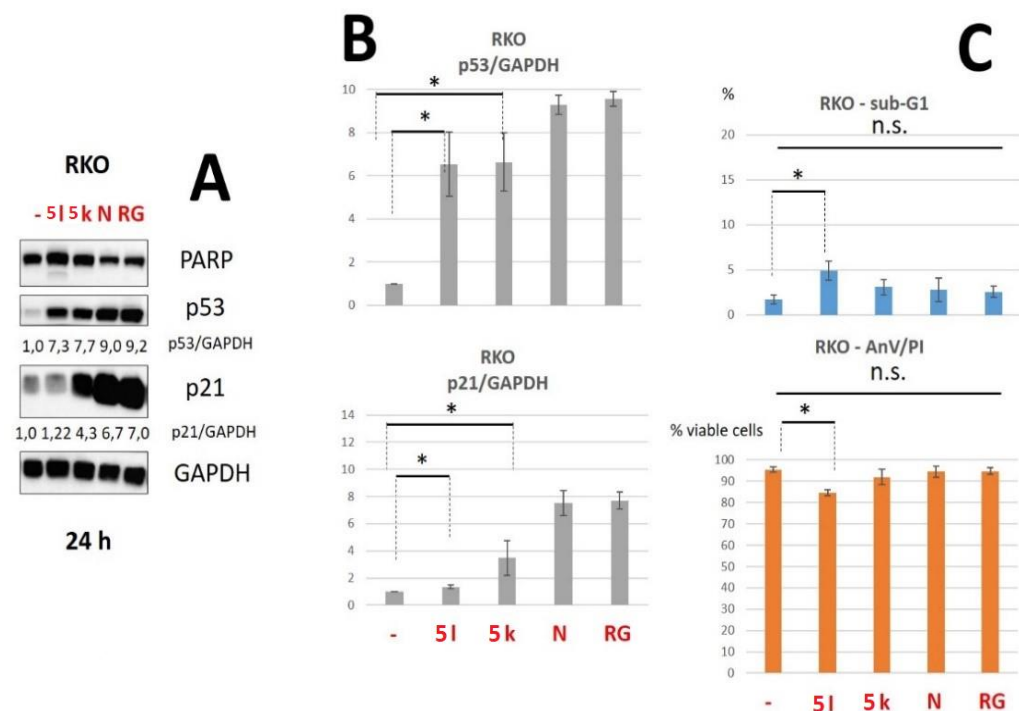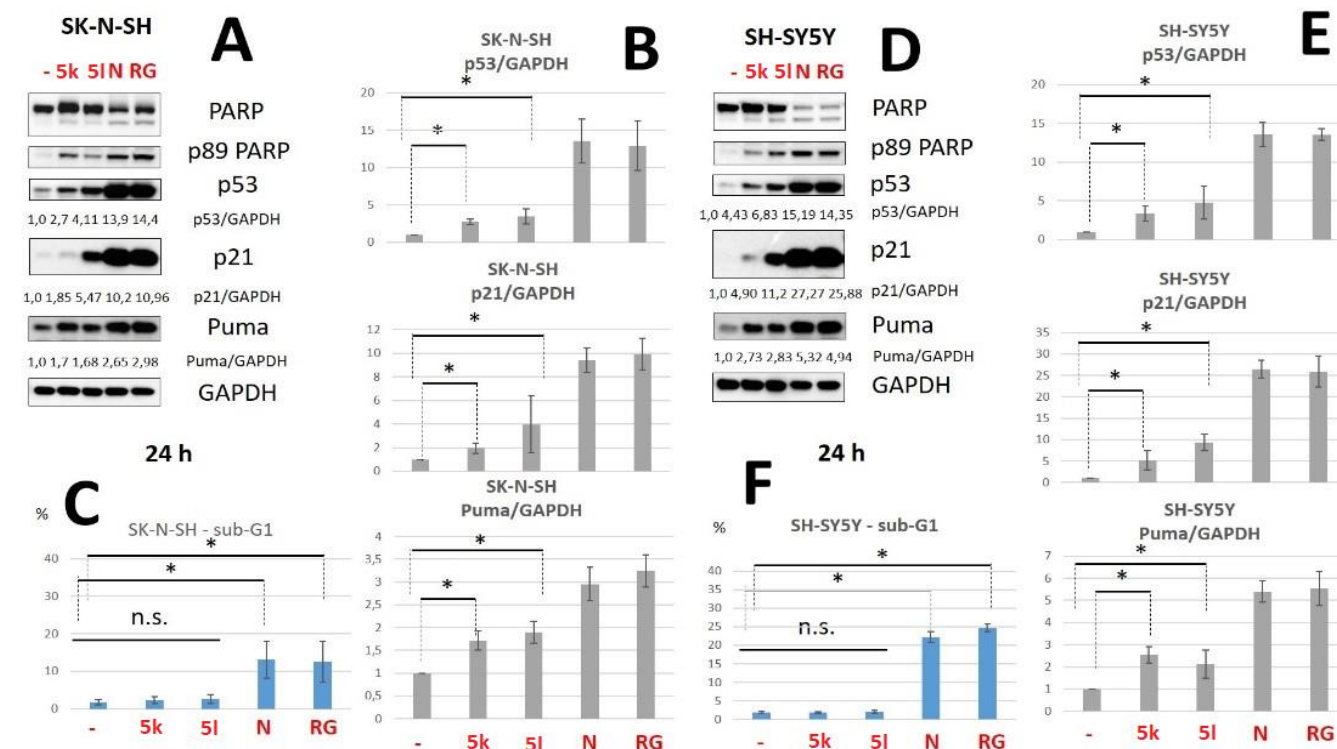

(A). Western Blot analysis of total cellular lysates from RKO cells upon the treatment with compounds 2I, 2k (both—20  $\mu$ M), Nutlin-3a (10  $\mu$ M) and RG7388 (5  $\mu$ M). (B)—Densitometric analysis of p53 bands normalized to GAPDH. Data are presented as mean  $\pm$  SD from three independent experiments. (C)—The histograms of flow cytometry (FC) analysis data for RKO cells: sub-G1 assay (up), %—percent of Sub-G1 population and Annexin V-FITC/PI staining (below), % viable cells—cells negative for both Annexin V-FITC and propidium iodide (PI).

Western Blot analysis of total cellular lysates from SK-N-SH (A) and SH-SY5Y (D) cells upon the treatment with compounds 2I, 2k (both—20  $\mu$ M), Nutlin-3a (10  $\mu$ M) and RG7388 (5  $\mu$ M). (B,E)—Densitometric analysis of p53, p21 and Puma bands normalized to GAPDH in SK-N-SH (B) and SH-SY5Y (E) cells. Data are presented as mean  $\pm$  SD from three independent experiments. (C,F)—The histogram of flow cytometry (FC) analysis data for SK-N-SH cells using sub-G1 assay, %—percent of Sub-G1 population.

Bazanov, D.R.; Pervushin, N.V.; Savin, E.V. Michael D. Tsymliakov, Anita I. Maksutova, Victoria Yu. Savitskaya, Sergey E. Sosonyuk, Yulia A. Gracheva, Michael Yu. Seliverstov, Natalia A. Lozinskaya and Gelina S. Kopeina. **Synthetic design and biological evaluation of new p53-MDM2 interaction inhibitors based on imidazoline core.** *Pharmaceuticals* **2022**, *15*, 4. <https://doi.org/10.3390/ph15040444>

# 12. Conclusions

1. A series of 2,4,5-triarylimidazolines was synthesized, the cytotoxicity of the derivatives obtained was tested, and the compound that most effectively stabilizes the level of p53 in tumor cells was determined.
2. Modification of 2,4,5-triarylimidazolines with sulfamoyl chloride derivatives was carried out, their biological activity was evaluated by the ability to stabilize the p53 protein.
3. Modification of 2,4,5-triarylimidazolines by derivatives of secondary amines and BTC was carried out. A leader compound has been determined that stabilizes the p53 level by more than 7 times compared to the control. Activity was confirmed on five cell lines.

**ECMC**  
**2022**

**The 8th International Electronic  
Conference on Medicinal Chemistry**  
01–30 NOVEMBER 2022 | ONLINE
